# Supplementary material for: Auto-antibody evaluation in idiopathic interstitial pneumonia and worse survival of patients with Ro52/TRIM21auto-antibody
Source: PubMed Central journal article supplement (PMC7533866; doi:10.3164/jcbn.20-5), 2020-05-15
Supplement: jcbn20-5sf01.pdf [file jcbn20-5sf01.pdf]

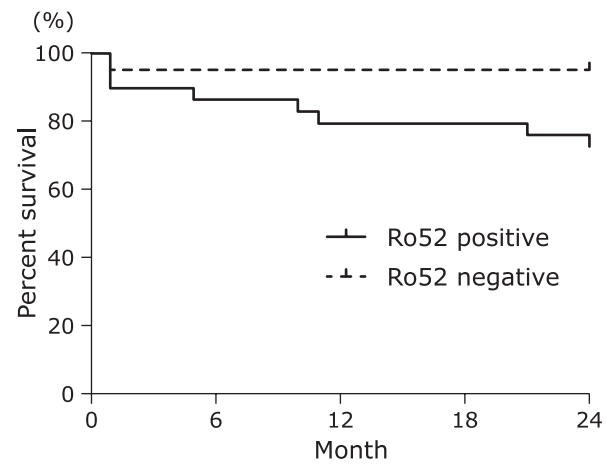

**Supplemental Fig. 1.** Kaplan-Meier curve to compare survival in the Ro52 positive patients ( $n = 29$ ) and Ro52 negative but other antibodies positive patients ( $n = 20$ ) for 24 months period. IP patients showing myositis panel test (MPT) positive without CTDs were investigated (total  $n = 49$ ).
