# Supplementary material for: Auto-antibody evaluation in idiopathic interstitial pneumonia and worse survival of patients with Ro52/TRIM21auto-antibody
Source: PubMed Central journal article supplement (PMC7533866; doi:10.3164/jcbn.20-5), 2020-05-15
Supplement: jcbn20-5st01.pdf [file jcbn20-5st01.pdf]

**Supplemental Table 1.** Characteristics of enrolled patients in this study

| Parameters            | MPT positive | MPT negative |
|-----------------------|--------------|--------------|
| Total (n)             | 67 (23.5%)   | 218 (76.4%)  |
| Gender (n)            |              |              |
| Male                  | 31           | 141          |
| Female                | 36*          | 77           |
| Age [mean (SD)]       | 69.7 (10.9)  | 69.7 (10.8)  |
| Smoking status (n)    |              |              |
| Former, Current       | 27           | 164          |
| Never                 | 40*          | 54           |
| Pack-year [mean (SD)] | 23.5 (39.6)  | 25.8 (36.6)  |
| HRCT pattern (n)      |              |              |
| UIP                   | 18           | 75           |
| f-NSIP                | 31           | 81           |
| c-NSIP                | 9            | 15           |
| AIP                   | 6            | 8            |
| COP                   | 3            | 29           |
| PPFE                  | 0            | 4            |
| RB-ILD                | 0            | 3            |
| HP                    | 0            | 3            |

Data are presented as mean  $\pm$  SD and number of patients as *n*. MPT, myositis panel test. HRCT classification are indicated usual interstitial pneumonia (UIP), fibrotic non-specific interstitial pneumonia (f-NSIP), cellular non-specific interstitial pneumonia (c-NSIP), acute interstitial pneumonia (AIP), cryptogenic organizing pneumonia (OP), pleuroparenchymal fibroelastosis (PPFE), respiratory bronchiolitis-associated interstitial lung disease (RB-ILD), and hypersensitivity pneumonia (HP). \* $p < 0.05$ .
