# Supplementary material for: Auto-antibody evaluation in idiopathic interstitial pneumonia and worse survival of patients with Ro52/TRIM21auto-antibody
Source: PubMed Central journal article supplement (PMC7533866; doi:10.3164/jcbn.20-5), 2020-05-15
Supplement: jcbn20-5st02.pdf [file jcbn20-5st02.pdf]

**Supplemental Table 2.** Number of patients of connective tissue diseases with myositis panel test positive and the each antibody

| Diagnosis for CTDs | Number of CTDs patients | Total Ro52 positive | Myositis panel test positive number of patients (antibody) |               |                      | CT number of patients (pattern) |              |                     |
|--------------------|-------------------------|---------------------|------------------------------------------------------------|---------------|----------------------|---------------------------------|--------------|---------------------|
|                    |                         |                     | Ro52 mono                                                  | Ro52 overlap  | Ro52 negative        | Ro52 mono                       | Ro52 overlap | Ro52 negative       |
| PM                 | 2                       | 1                   | 0                                                          | 1 (Jo-1)      | 1 (Mi-2 $\beta$ )    | 0                               | 1 (f-NSIP)   | 1 (AIP)             |
| DM                 | 3                       | 1                   | 0                                                          | 1 (SRP)       | 2 (Ku, PM-scl75)     | 0                               | 1 (UIP)      | 1 (fNSIP), 1 (UIP)  |
| PM/DM              | 1                       | 1                   | 1                                                          | 0             | 0                    | 1 (AIP)                         | 0            | 0                   |
| SjS                | 7                       | 4                   | 2                                                          | 2 (PL-12, EJ) | 3 (PM-scl75, EJ, Ku) | 2 (f-NSIP)                      | 2 (f-NSIP)   | 2 (f-NSIP), 1 (UIP) |
| SjS + PM/DM        | 1                       | 0                   | 0                                                          | 0             | 1 (Jo-1)             | 0                               | 0            | 1 (f-NSIP)          |
| SjS + SSc          | 1                       | 1                   | 0                                                          | 1 (PM-scl75)  | 0                    | 0                               | 1 (UIP)      | 0                   |
| RA                 | 2                       | 2                   | 2                                                          | 0             | 0                    | 1 (AIP), 1 (f-NSIP)             | 0            | 0                   |
| ANCA vasculitis    | 1                       | 0                   | 0                                                          | 0             | 1 (Mi-2 $\beta$ )    | 0                               | 0            | 1 (c-NSIP)          |
| Total (n)          | 18                      | 10                  | 5                                                          | 5             | 8                    |                                 |              |                     |

CTDs, connective tissue diseases; MPT, myositis panel test. Number of patient (each MPT antibody or chest CT pattern) are indicated. Ro52mono, Ro52 mono positive in myositis panel test (MPT) patients; Ro52overlap, Ro52 positive and other antibodies overlap in MPT; Ro52 negative, Ro52 negative but other antibody positive in MPT. HRCT patterns are indicated usual interstitial pneumonia (UIP), fibrotic non-specific interstitial pneumonia (f-NSIP), cellular non-specific interstitial pneumonia (c-NSIP), acute interstitial pneumonia (AIP), cryptogenic organizing pneumonia (OP), pleuroparenchymal fibroelastosis (PPFE), respiratory bronchiolitis-associated interstitial lung disease (RB-ILD), and hypersensitivity pneumonia (HP).
